# Supplementary material
Source: PubMed Central journal article supplement (PMC2990687)
Supplement: NIHMS105561-supplement-Supplementary_material.pdf [file NIHMS105561-supplement-Supplementary_material.pdf]

## Supplementary Material

**Oral Glucose Tolerance Test (OGTT):** After a 12-hour fast, subjects were given 75 grams oral glucose solution. Plasma glucose, insulin levels, C-peptides and free fatty acids were obtained from blood samples drawn at -15, 0, 30, 60, 90, 120 and 180 minutes from intravenous line after the oral glucose load.

**Frequently Sampled Intravenous Glucose Tolerance Test (FSIGT):** Insulin resistance was determined by the Insulin Sensitivity Index ( $S_I$ ) using minimal model equations with data from the insulin-modified frequently sampled intravenous glucose tolerance test (IM-FSIGT) (MinMOD Millennium v6.01, MinMOD Inc., Los Angeles, CA). The IM-FSIGT was performed at 8AM after a 12 hour fast. At time 0 glucose (0.3g/kg) was injected over 1 minute. At 20 minutes an intravenous bolus of insulin (0.03mU/kg) was given. Glucose and insulin concentrations were determined at -10, -1, 0, 1, 2, 3, 4, 5, 6, 7, 8, 10, 12, 14, 16, 19, 22, 23, 24, 25, 27, 30, 40, 50, 60, 70, 80, 90, 100, 120, 150, 180 min.

**Body Mass Index (BMI):** Weight (kg) and height (m) were recorded with empty bowel and bladder. BMI was calculated by the formula:  $BMI = \text{weight (kg)} / \text{height (m)}^2$ .

**Waist/Hip Ratio:** A trained investigator measured waist/hip ratio at the start and end of the 48 weeks of treatment.

**Dual Energy X-ray Absorptiometry (DEXA):** DEXA was used to estimate total body fat. Whole body composition measurement were made, using a Hologic QDR 4500A DEXA in the array beam whole body mode with software version 8.26a:3. Mass (in grams) of total body and regional fat content were determined.

**Computerized Tomography (CT) of the Abdomen:** 10mm CT slices were obtained at the level of lumbar spine vertebrae 2-3 and 4-5. The images were analyzed by MEDX image analysis software (Sensor System, Inc, Sterling, VA) and the total abdominal adipose tissue, visceral adipose tissue and subcutaneous adipose tissue volumes were calculated.

**Magnetic resonance imaging (MRI) of the liver:** MRI was done to evaluate liver size and estimate liver fat content. MRI scans were done as previously described (*promrat et al*). Axial in-phase and out-of-phase breath-hold gradient echo scans of the liver were obtained with previously described parameters (*promrat et al*). The analysis to quantify fat in the liver and measurements of liver volume was done using the MEDex software analysis package (Sensor Systems, Inc., Sterling, VA) run on a Linux platform. The modified Dixon method was used to measure hepatic fat fraction. Region of interest (ROIs) were placed in liver on the in-phase scans to include maximum liver parenchyma without contamination with blood vessels or motion artifacts. The MEDex software package then transposed these same ROIs onto the out-of-phase images and calculated the hepatic fat fraction (FF) based upon the following formula:  $FF = (\text{Signal in-phase} - \text{signal out-of-phase}) / (2 \times \text{Signal in-phase})$ .
